# Supplementary material
Source: PubMed Central journal article supplement (PMC6980747)
Supplement: NIHMS1545170-supplement-1.pdf [file NIHMS1545170-supplement-1.pdf]

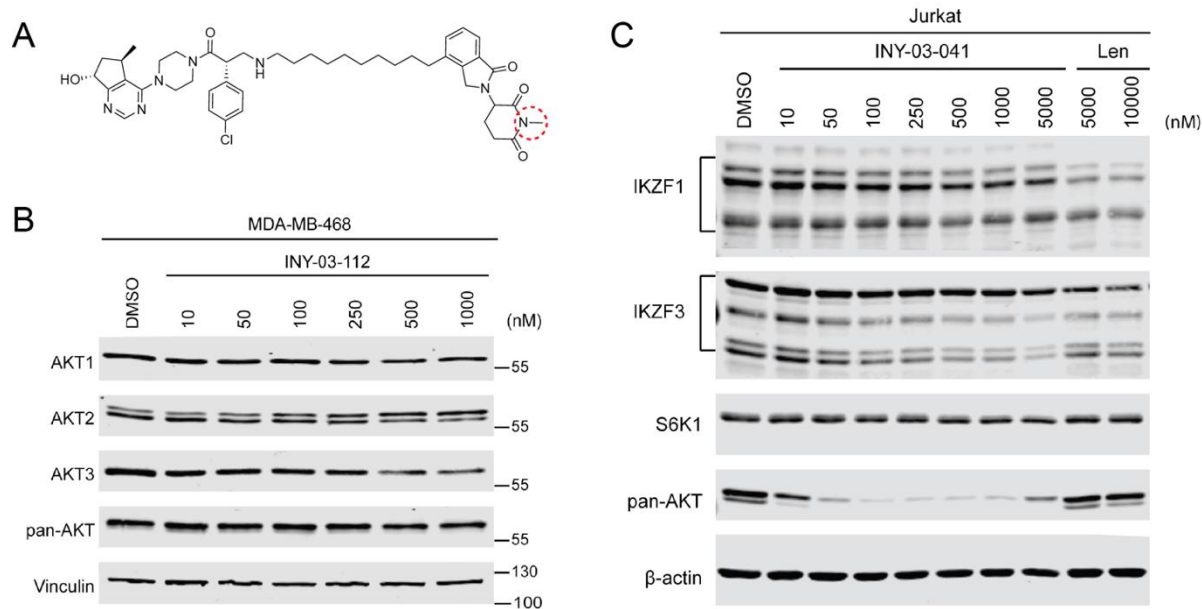

**Figure S1. INY-03-041 requires CRBN binding to induce highly selective AKT degradation.** *Related to Figure 1 and Figure 2.* (A) Chemical structure of negative control compound INY-03-112, with N-methylated glutarimide circled. (B) Immunoblots for AKT1, AKT2, AKT3, pan-AKT and Vinculin in MDA-MB-468 cells after 12-hour treatment with DMSO or INY-03-112 at the concentrations indicated (n=2). (C) Immunoblots for IKZF1, IKZF3, S6K1, pan-AKT and  $\beta$ -actin in Jurkat cells after 24-hour treatment with DMSO, INY-03-041, or lenalidomide (Len) at the concentrations indicated (n=3).

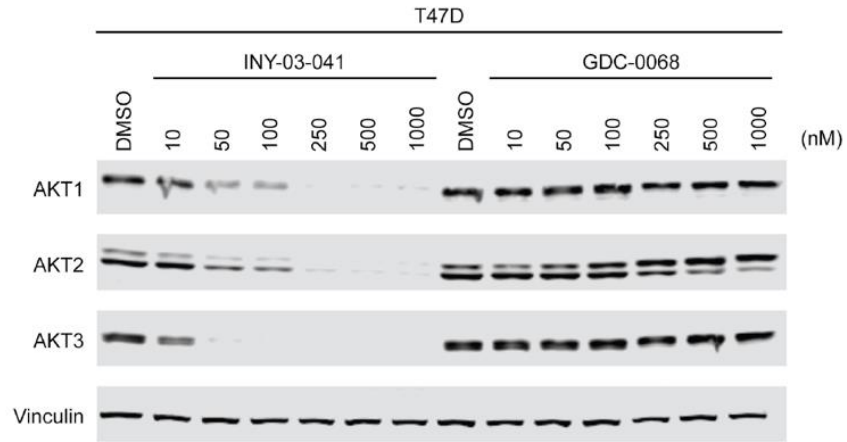

**Figure S2. INY-03-041 induces degradation of AKT isoforms in T47D cells.** *Related to Figure 4.* Immunoblots of AKT1, AKT2, AKT3 and Vinculin after treating T47D cells for 24 hours with DMSO, INY-03-041, or GDC-0068 at the concentrations indicated (n=3).

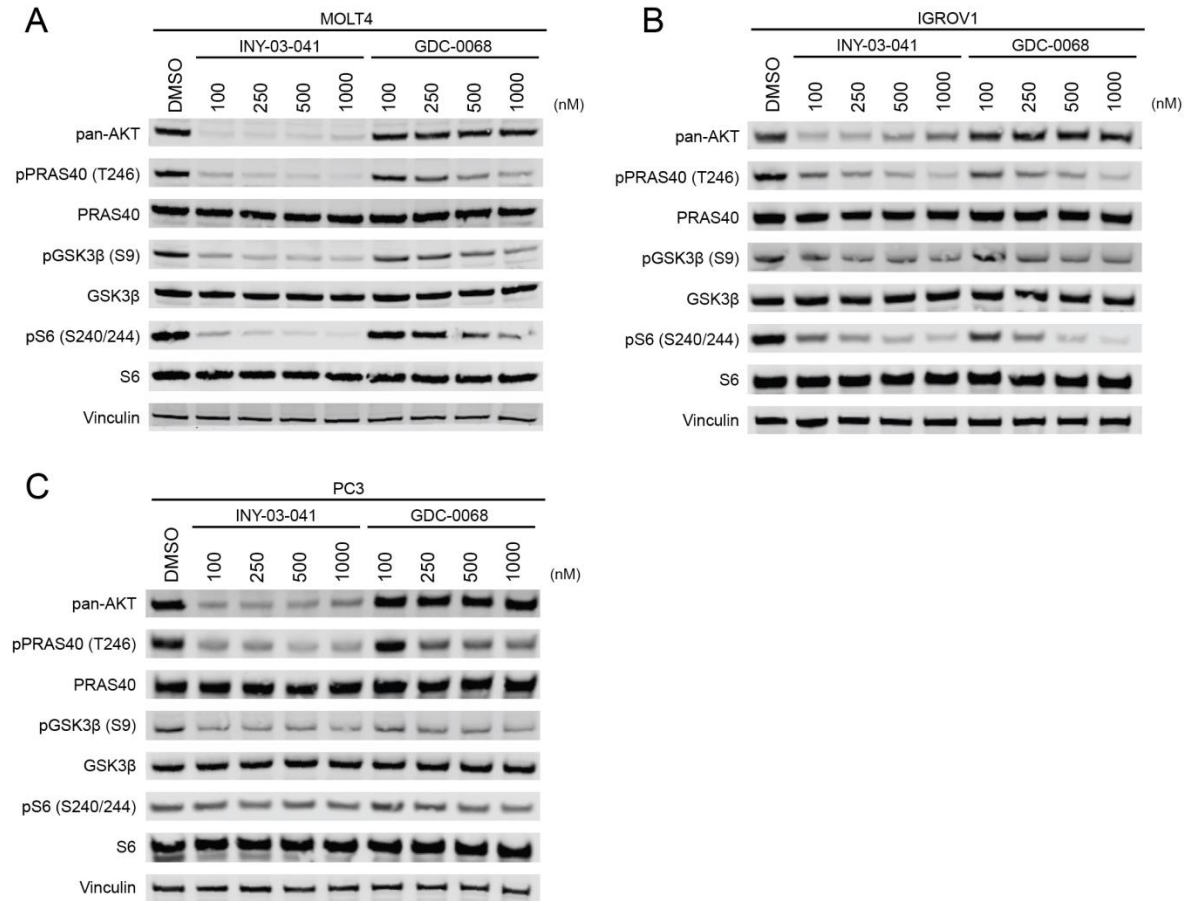

**Figure S3. INY-03-041 induces potent downregulation of AKT signaling in MOLT4, IGROV1 and PC3 cells.** *Related to Figure 4.* Immunoblots of pan-AKT, phospho-PRAS40 (T246), total PRAS40, phospho-GSK3β (S9), total GSK3β, phospho-S6 (S240/244), total S6 and Vinculin in (A) MOLT4, (B) IGROV1 and (C) PC3 cells after treatment with DMSO, INY-03-041, or GDC-0068 for 24 hours at concentrations indicated (n=2).

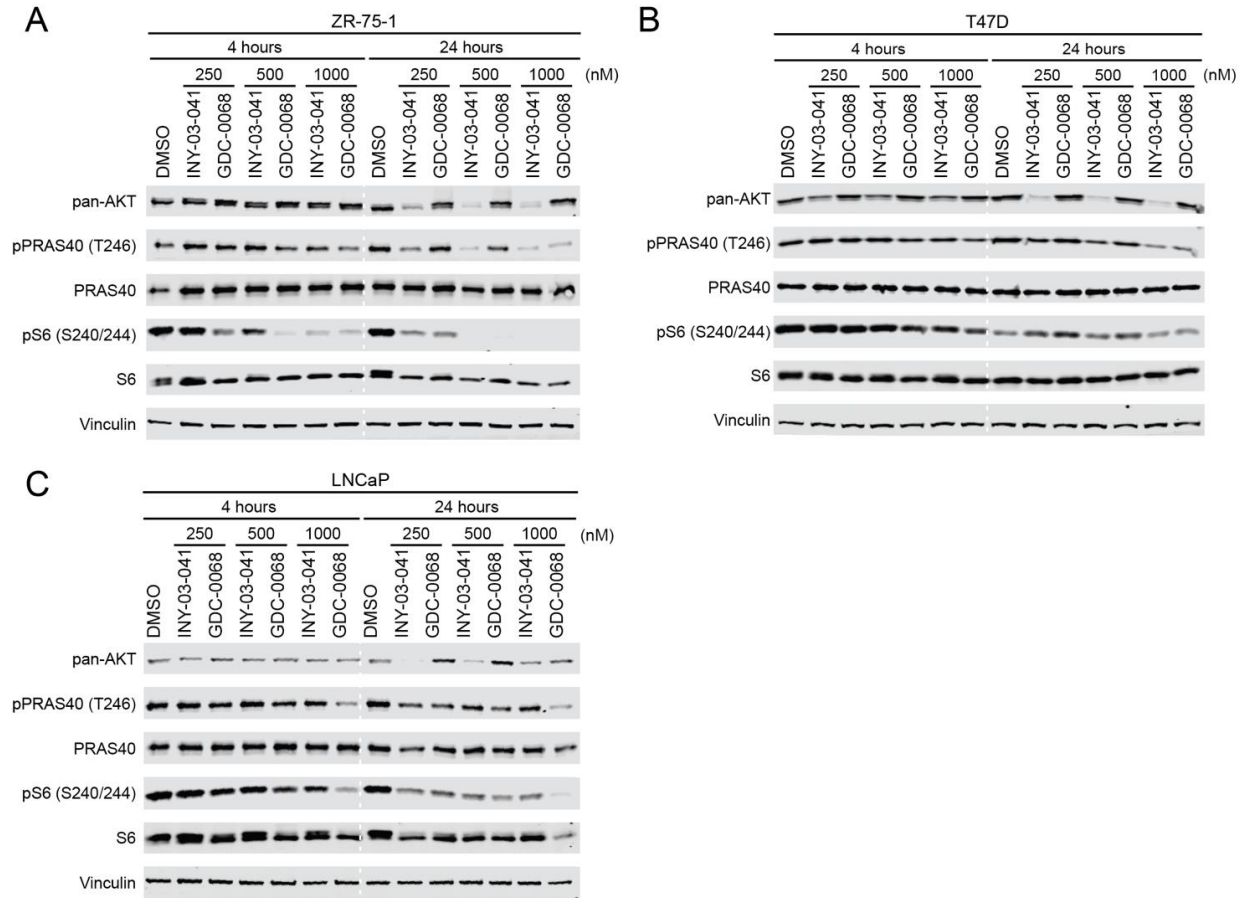

**Figure S4. INY-03-041 requires longer time points than GDC-0068 to display inhibition of downstream AKT signaling.** *Related to Figure 4.* Immunoblots of pan-AKT, phospho-PRAS40 (T246), total PRAS40, phospho-S6 (S240/244), total S6 and Vinculin in (A) ZR-75-1, (B) T47D and (C) LNCaP cells after treatment with DMSO, INY-03-041, and GDC-0068 for 4 or 24 hours at indicated concentrations (n=2).

**Table S3. Hormone receptor and mutational status of PIK3CA and PTEN in cancer cell line panel.** *Related to Figure 3.* The tissue, cancer subtype and status of each gene (Meric-Bernstam et al., 2012; Vlietstra et al., 1998) as wild-type (wt), mutated (mut) or deleted (del) is indicated. Triple negative breast cancer (TNBC).

| <b>Cell Line</b> | <b>Tissue</b> | <b>Cancer Subtype</b> | <b>PIK3CA</b> | <b>PTEN</b> |
|------------------|---------------|-----------------------|---------------|-------------|
| ZR-75-1          | Breast        | Luminal A             | wt            | mut (L108R) |
| T47D             | Breast        | Luminal A             | mut (H1047R)  | wt          |
| LNCaP            | Prostate      | Androgen-dependent    | wt            | del/mut     |
| MCF-7            | Breast        | Luminal A             | mut (E545K)   | wt          |
| MDA-MB-468       | Breast        | TNBC – Basal A        | wt            | del         |
| HCC1937          | Breast        | TNBC – Basal A        | wt            | del         |

**Table S4. GR values indicate anti-proliferative advantage of INY-03-041.** *Related to Figure 3.* (A) GR values were calculated after 72-hour treatment with the compounds indicated over a range of concentrations. GR<sub>50</sub> values represent compound potency, GR<sub>max</sub> values measure the efficacy of the drug at high concentrations. GR<sub>AOC</sub> captures changes in potency and efficacy and is calculated by integrating GR curve over a range of concentrations.

GR<sub>50</sub> (μM)

| <b>Cell Line</b> | <b>INY-03-041</b> | <b>INY-03-112</b> | <b>GDC-0068</b> | <b>Lenalidomide</b> |
|------------------|-------------------|-------------------|-----------------|---------------------|
| ZR-75-1          | 0.016             | 0.413             | 0.229           | inf                 |
| T47D             | 0.178             | 1.34              | 1.53            | inf                 |
| LNCaP            | 0.130             | 1.38              | 1.32            | inf                 |
| MCF-7            | 0.148             | 1.49              | 1.72            | inf                 |
| MDA-MB-468       | 1.69              | 2.70              | 12.9            | inf                 |
| HCC1937          | 1.65              | 2.42              | inf             | inf                 |

GR<sub>max</sub>

| <b>Cell Line</b> | <b>INY-03-041</b> | <b>INY-03-112</b> | <b>GDC-0068</b> | <b>Lenalidomide</b> |
|------------------|-------------------|-------------------|-----------------|---------------------|
| ZR-75-1          | -0.688            | -0.517            | -0.384          | 0.744               |
| T47D             | -0.321            | -0.163            | 0.054           | 0.999               |
| LNCaP            | 0.011             | 0.212             | 0.017           | 0.829               |
| MCF-7            | -0.305            | -0.332            | 0.218           | 0.910               |
| MDA-MB-468       | -0.819            | -0.832            | 0.518           | 0.940               |
| HCC1937          | -0.813            | -0.726            | 0.538           | 0.905               |

GR<sub>AOC</sub>

| <b>Cell Line</b> | <b>INY-03-041</b> | <b>INY-03-112</b> | <b>GDC-0068</b> | <b>Lenalidomide</b> |
|------------------|-------------------|-------------------|-----------------|---------------------|
| ZR-75-1          | 1.17              | 0.329             | 0.705           | 0.085               |
| T47D             | 0.630             | 0.198             | 0.285           | -0.010              |
| LNCaP            | 0.549             | 0.186             | 0.330           | 0.042               |
| MCF-7            | 0.627             | 0.320             | 0.243           | 0.021               |
| MDA-MB-468       | 0.430             | 0.319             | 0.140           | 0.033               |
| HCC1937          | 0.415             | 0.313             | 0.156           | -0.008              |
